# Supplementary material for: Rationally designed yolk–shell Co9S8–Co1−xS hollow spheres for advanced sodium-ion storage
Source: Royal Society of Chemistry journal article supplement (doi:10.1039/d1ta05114h), 2021-01-01
Supplement: d1ta05114h1.pdf [file d1ta05114h1.pdf]

## Rationally Designed Yolk-Shell $\text{Co}_9\text{S}_8\text{-Co}_{1-x}\text{S}$ Hollow Spheres for High-Performance Sodium Storage

Yuanyi Luo, Ludi Shi, Huanze He, Guangtao Cong\*, Caizhen Zhu\*, Jian Xu

Institute of Low-dimensional Materials Genome Initiative, College of Chemistry and Environmental Engineering, Shenzhen University, Shenzhen, Guangdong, 518060, P. R. China.

E-mail: gtcong@szu.edu.cn, czzhu@szu.edu.cn

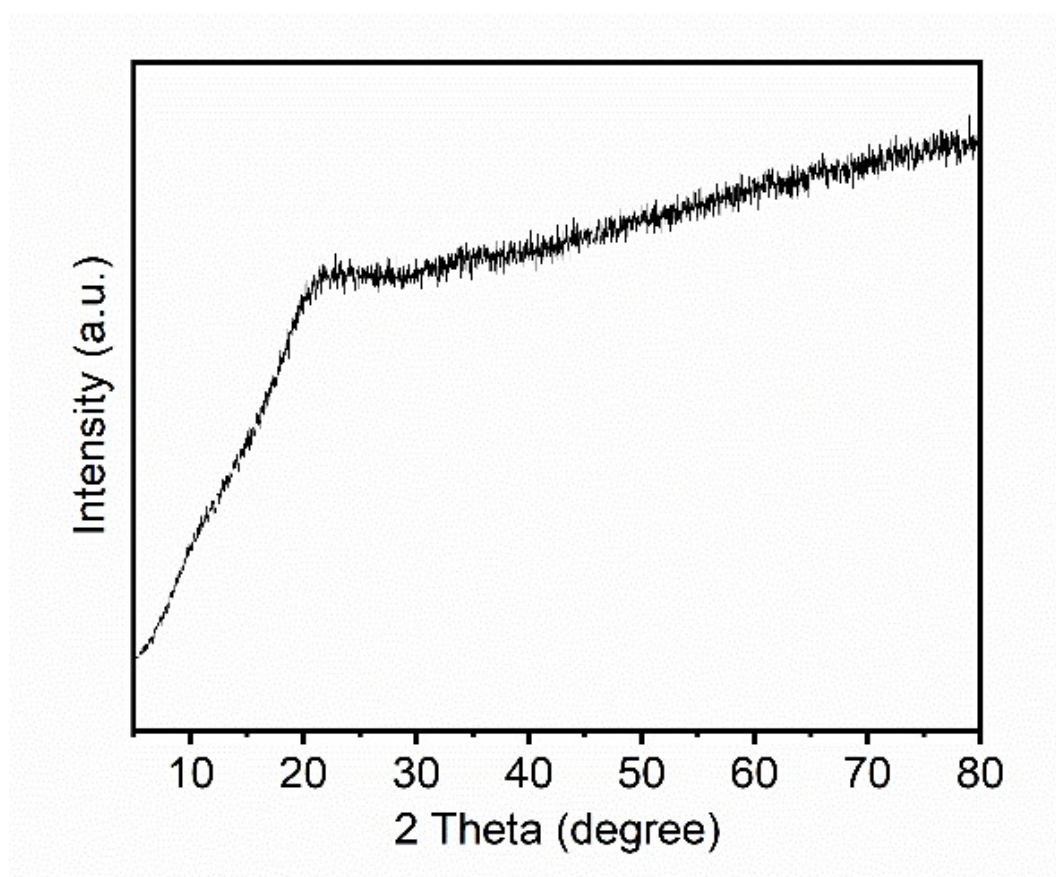

Fig. S1. XRD pattern of Co-G.

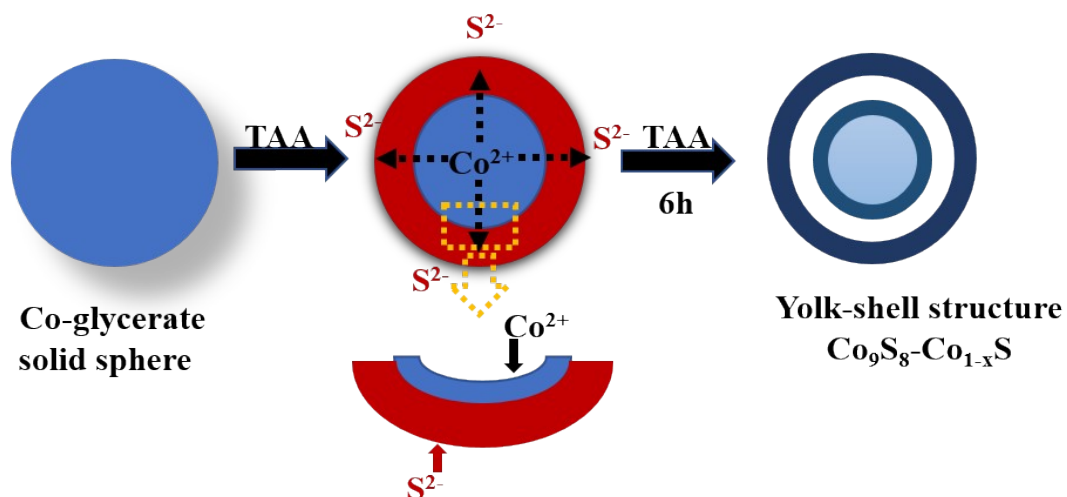

**Fig. S2.** Schematic illustration of the formation process of yolk-shelled  $Co_9S_8-Co_{1-x}S$  hollow spheres.

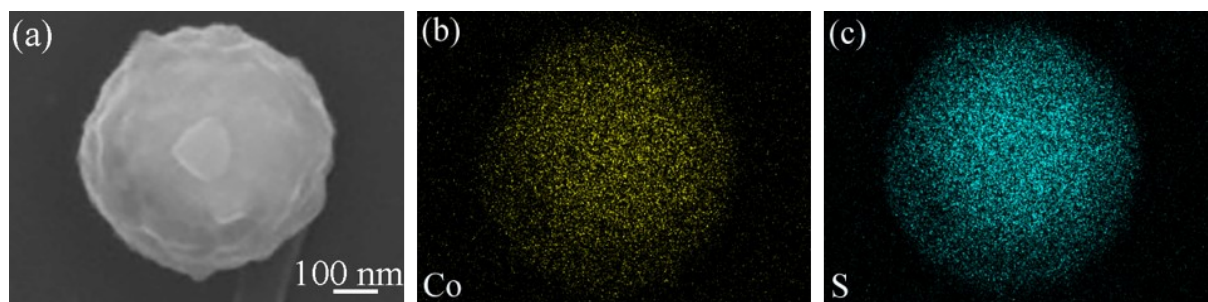

**Fig. S3.** EDS mapping of  $Co_9S_8-Co_{1-x}S$ .

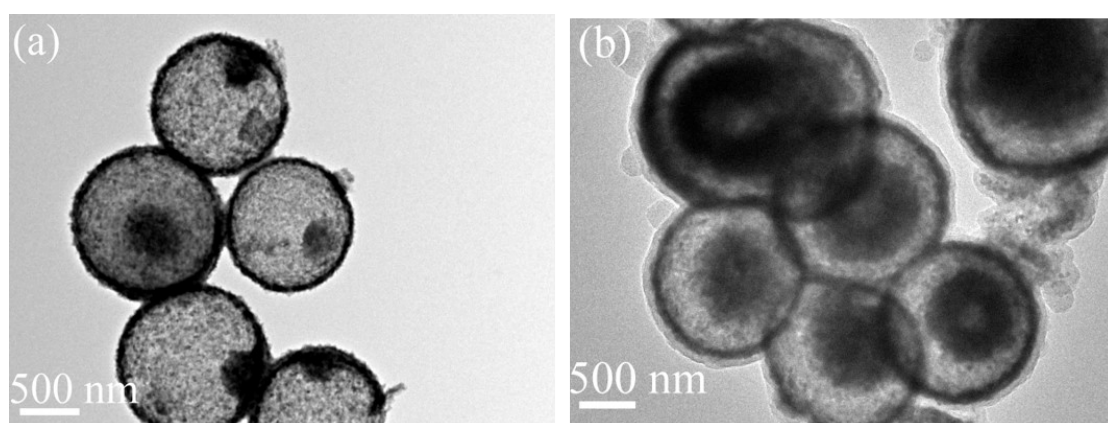

**Fig. S4.** FESEM of the  $Co_9S_8-Co_{1-x}S$  before (a) and after carbonization (b) at  $600^\circ C$  for 2h.

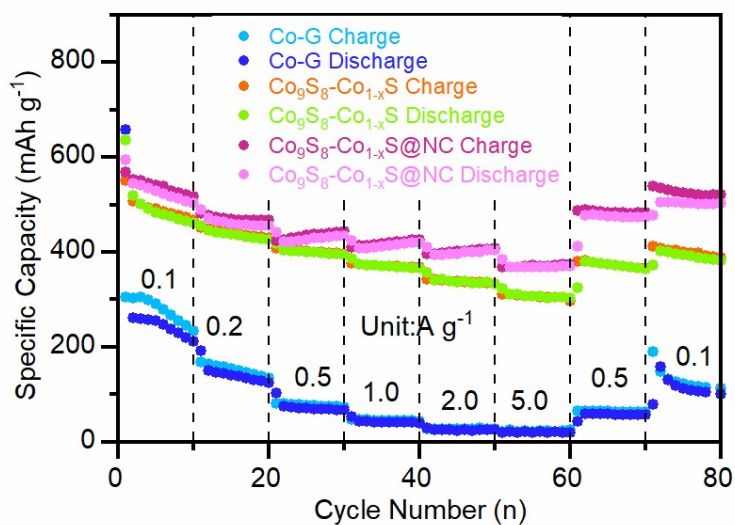

**Fig. S5.** Rate performance of Co-G,  $\text{Co}_9\text{S}_8\text{-Co}_{1-x}\text{S}$ , and  $\text{Co}_9\text{S}_8\text{-Co}_{1-x}\text{S@NC}$ .

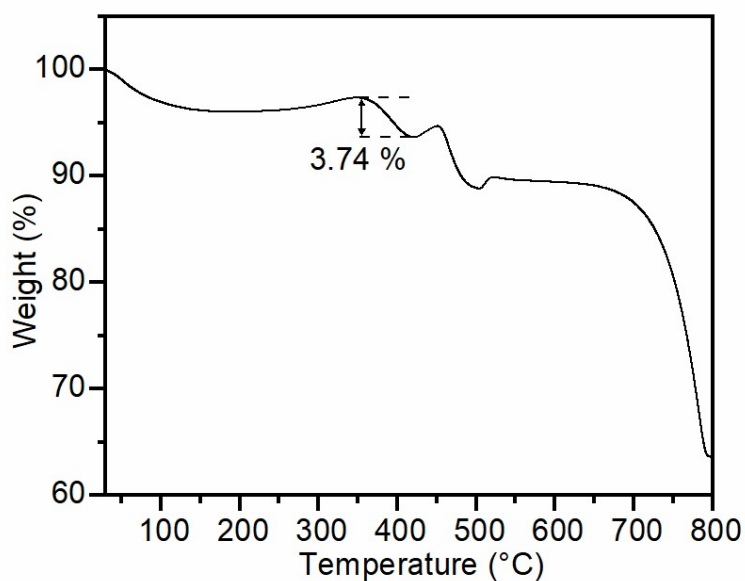

**Fig. S6.** TGA curves of the  $\text{Co}_9\text{S}_8\text{-Co}_{1-x}\text{S@NC}$  composite.

During the TGA test, the  $\text{Co}_9\text{S}_8\text{-Co}_{1-x}\text{S@NC}$  composite undergoes a multi-step reaction.  $\text{Co}_9\text{S}_8\text{-Co}_{1-x}\text{S}$  was oxidized to  $\text{CoSO}_4$ ,  $\text{CoO}$ ,  $\text{Co}_3\text{S}_4$  between 200 and 350°C, corresponding to the weight increase in the TGA curve. The weight loss around 400 °C could be ascribed to the gasification of carbon content and the weight fluctuation beyond 450°C could be assigned to the sequential oxidation of  $\text{CoO}$  to  $\text{Co}_3\text{O}_4$ ,  $\text{Co}_3\text{S}_4$  to  $\text{Co}_3\text{O}_4$  and  $\text{CoSO}_4$  to  $\text{Co}_3\text{O}_4$ .<sup>1</sup>

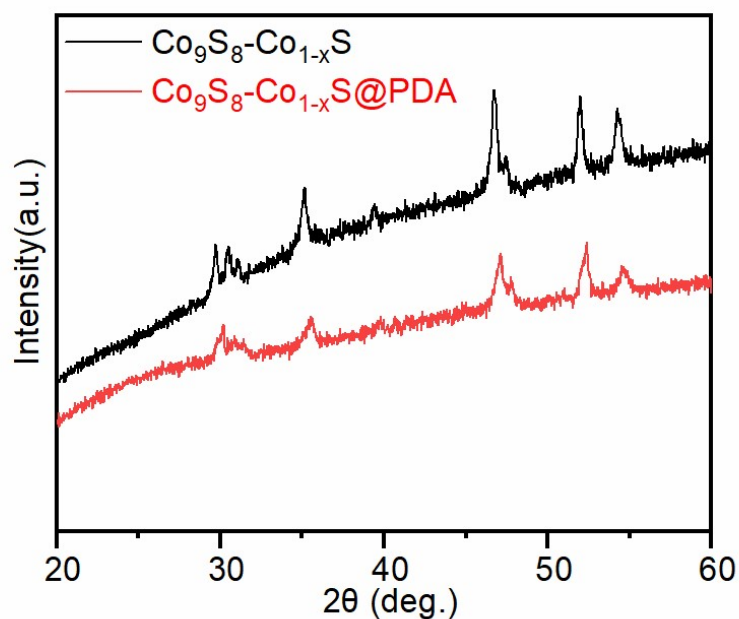

**Fig. S7.** XRD patterns of the  $\text{Co}_9\text{S}_8\text{-Co}_{1-x}\text{S@NC}$  and  $\text{Co}_9\text{S}_8\text{-Co}_{1-x}\text{S@PDA}$  composites.

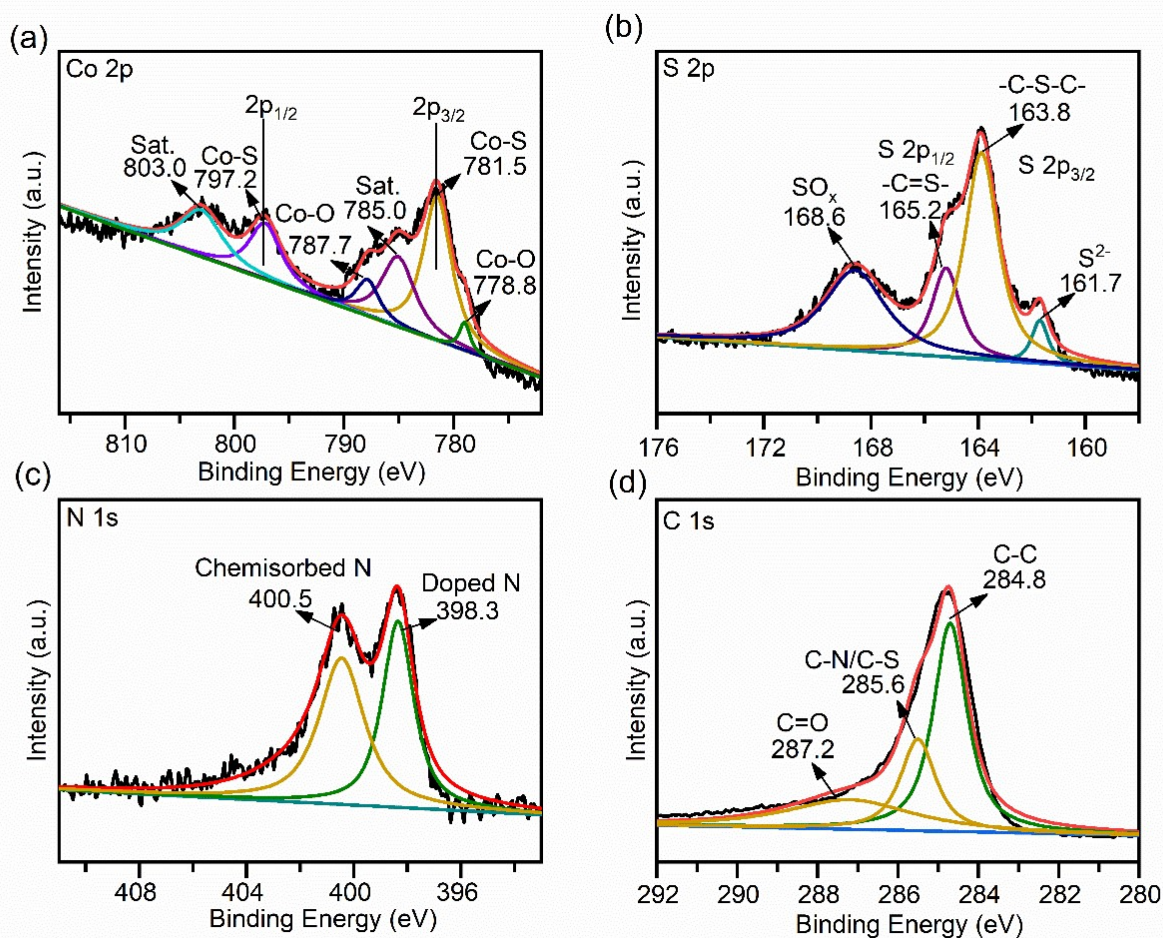

**Fig. S8.** XPS spectra of  $\text{Co}_9\text{S}_8\text{-Co}_{1-x}\text{S@NC}$ : (a) Co 2p; (b) S 2p; (c) N 1s and (d) C 1s.

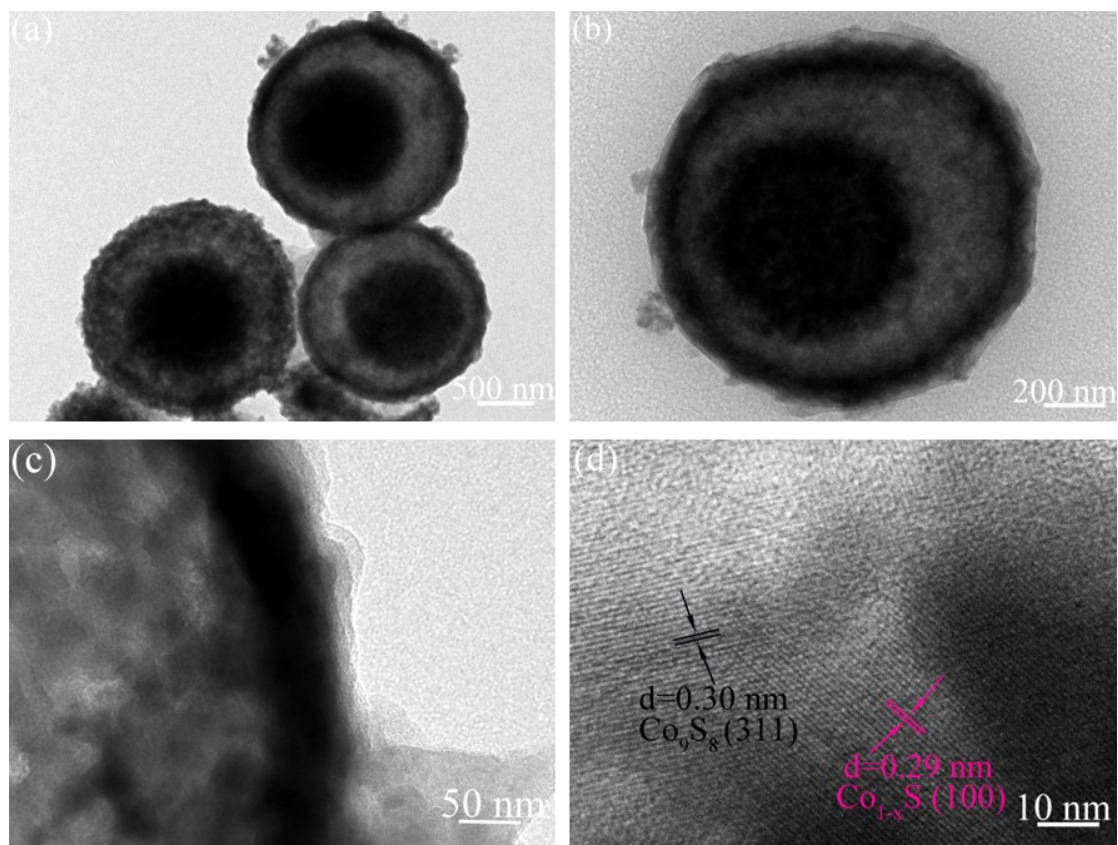

**Fig. S9.** (a) TEM images of  $\text{Co}_9\text{S}_8\text{-Co}_{1-x}\text{S@NC}$ . (b, c) TEM of an individual  $\text{Co}_9\text{S}_8\text{-Co}_{1-x}\text{S@NC}$  and (d) HRTEM images of (b, c) of  $\text{Co}_9\text{S}_8\text{-Co}_{1-x}\text{S@NC}$ .

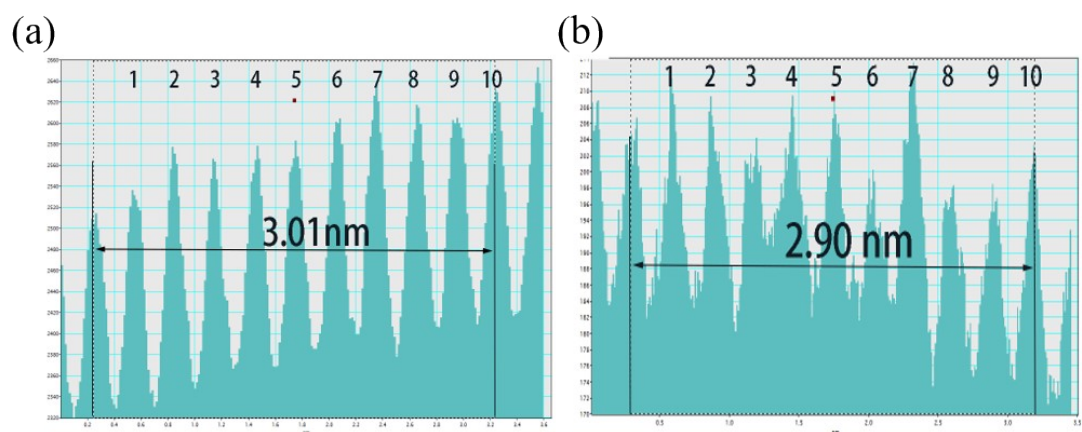

**Fig. S10.** Intensity profiles of the  $d$ -spacing in Fig. S9d.

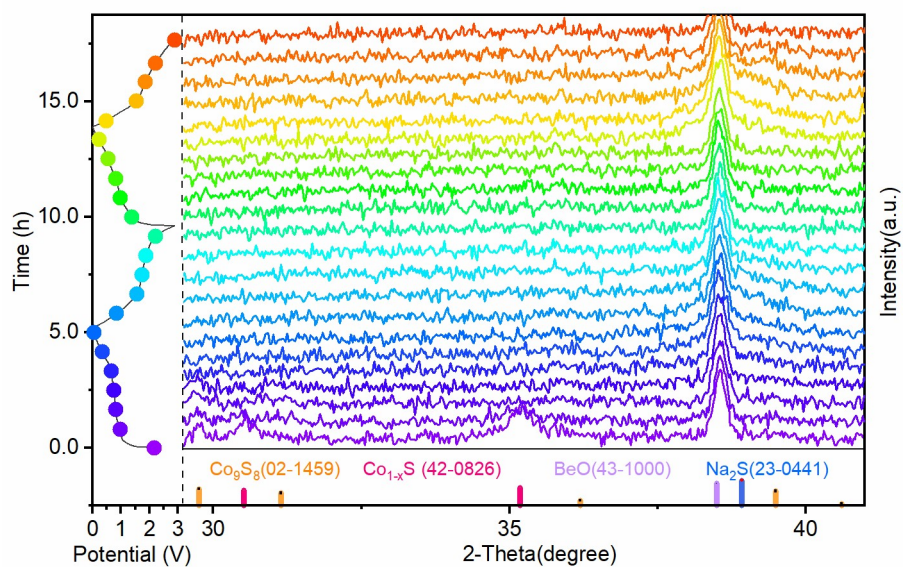

**Fig. S11.** The peak evolution during the in-situ XRD test.

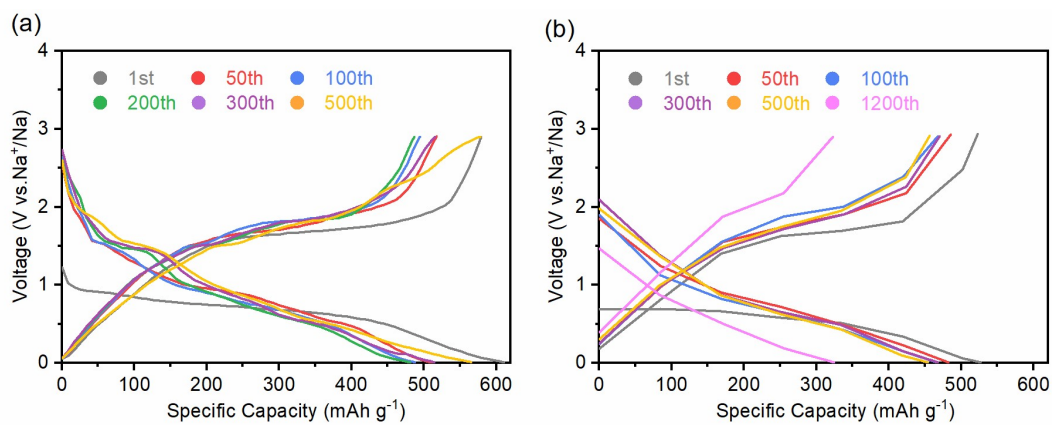

**Fig. S12.** Galvanostatic voltage profiles at (a)  $0.5 \text{ A g}^{-1}$  and (b)  $5 \text{ A g}^{-1}$ .

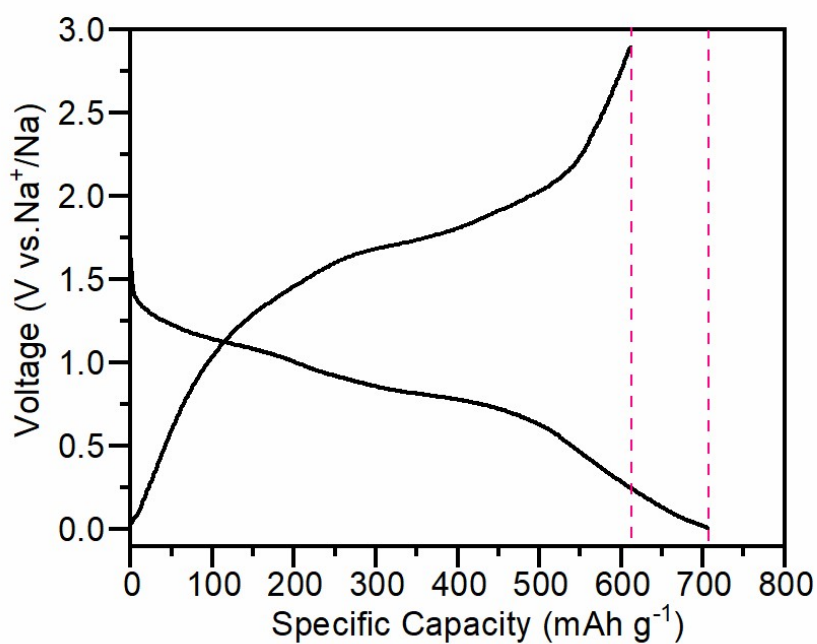

**Fig. S13.** Initial galvanostatic charge-discharge curves of the bare  $\text{Co}_9\text{S}_8\text{-Co}_{1-x}\text{S}$  electrode.

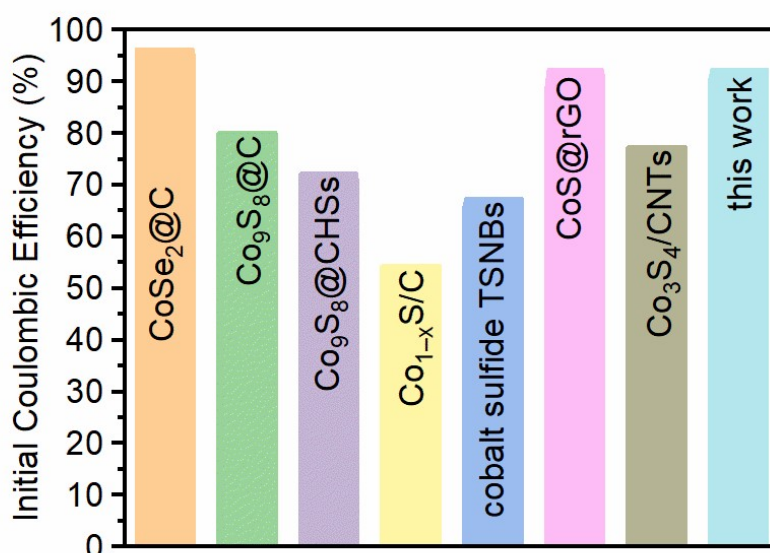

**Fig. S14.** The ICEs of the  $\text{Co}_9\text{S}_8\text{-Co}_{1-x}\text{S}@n\text{C}$  and other reported cobalt-based TMDCs ( $\text{CoSe}_2@\text{C}$ : ref.<sup>2</sup>,  $\text{Co}_9\text{S}_8@\text{C}$ : ref.<sup>3</sup>,  $\text{Co}_9\text{S}_8@\text{CHSS}$ : ref.<sup>4</sup>,  $\text{Co}_{1-x}\text{S}/\text{C}$ : ref.<sup>5</sup>, cobalt sulfide TSNBs: ref.<sup>6</sup>,  $\text{CoS}@r\text{GO}$ : ref.<sup>7</sup>,  $\text{Co}_3\text{S}_4/\text{CNTs}$ : ref.<sup>8</sup>)

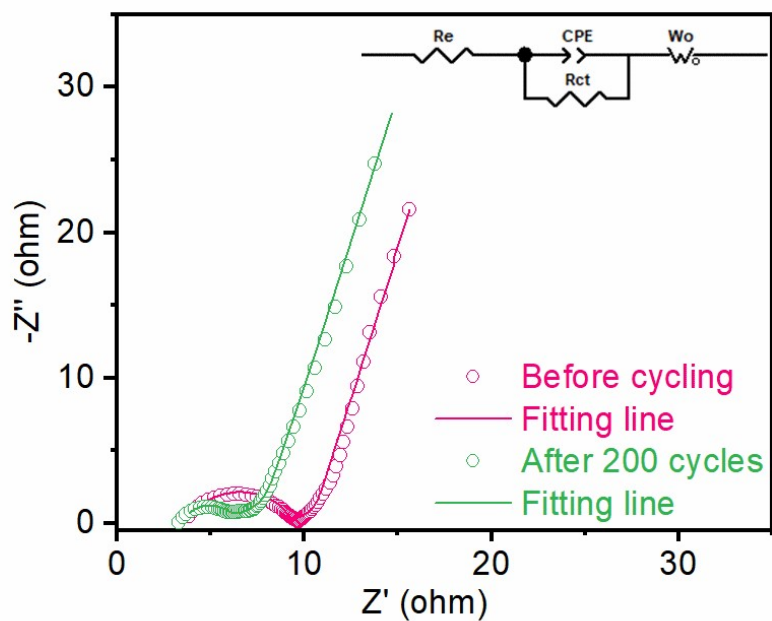

**Fig. S15.** Experimental and fitted Nyquist curves of  $\text{Co}_9\text{S}_8\text{-Co}_{1-x}\text{S@NC}$  electrode in before cycling and after 200 cycles at  $0.5 \text{ A g}^{-1}$ . Inset shows the model used to fit the Nyquist curves.

**Table S1.** Fitted electrochemical impedance parameters of  $\text{Co}_9\text{S}_8\text{-Co}_{1-x}\text{S@NC}$

| Sample                                             | Re               | $R_{ct}$ | CPE   |           |         |
|----------------------------------------------------|------------------|----------|-------|-----------|---------|
|                                                    |                  |          | CPE-T | CPE-P     |         |
| $\text{Co}_9\text{S}_8\text{-Co}_{1-x}\text{S@NC}$ | Before cycling   | 3.812    | 5.392 | 9.4794E-6 | 0.85726 |
|                                                    | After 200 cycles | 3.510    | 2.264 | 4.4677E-6 | 0.97043 |



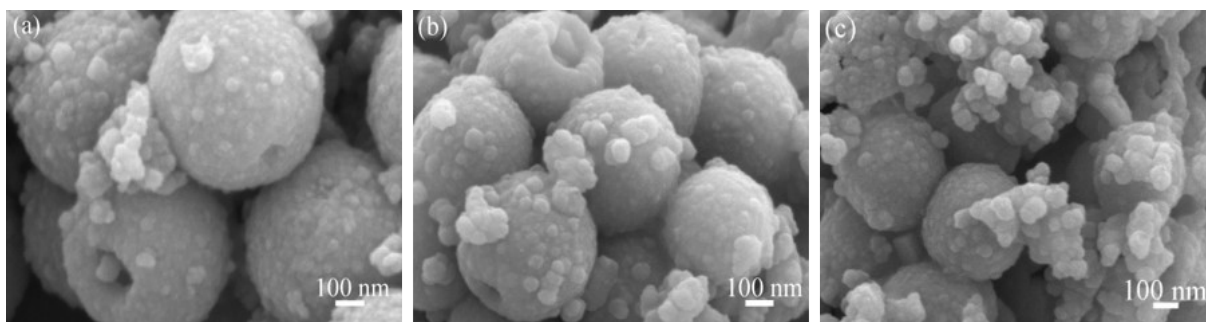

**Fig. S16.** Ex-situ SEM images of  $\text{Co}_9\text{S}_8\text{-Co}_{1-x}\text{S@NC}$  electrode in (a) before cycling;(b) after 200 cycles;(c) after 500 cycles at  $0.5 \text{ A g}^{-1}$ .

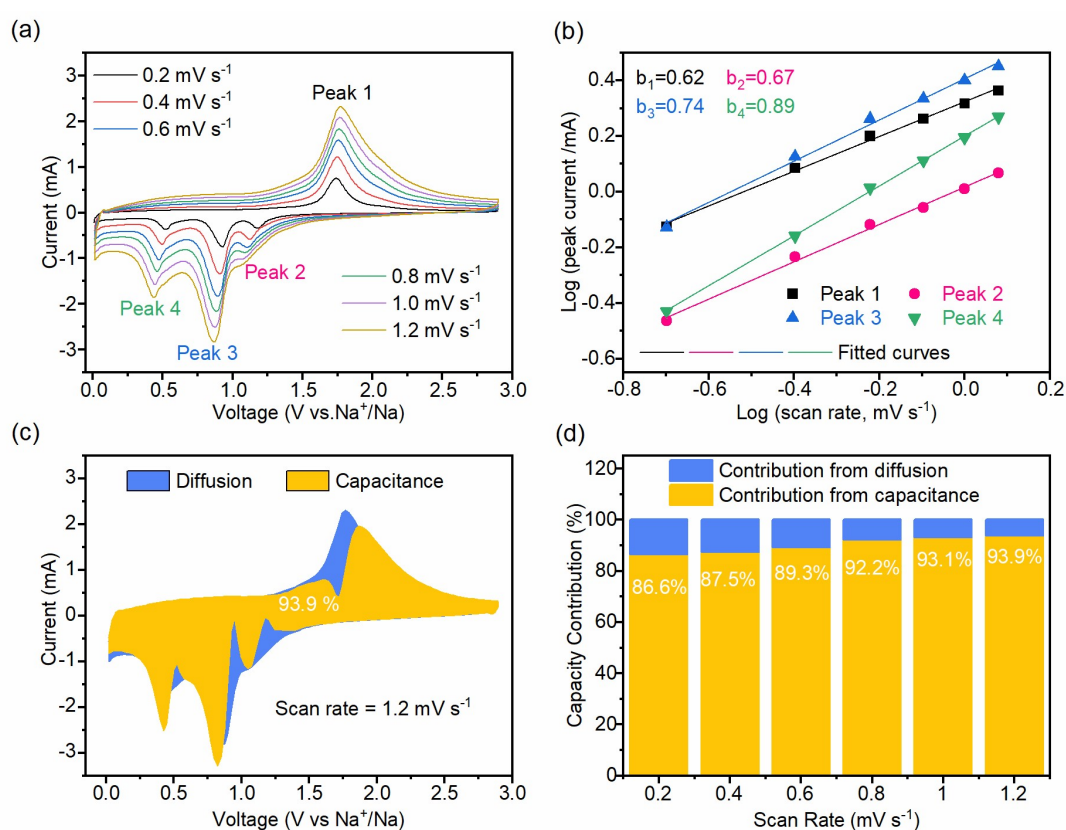

**Fig. S17.** (a) CV curves of the  $\text{Co}_9\text{S}_8\text{-Co}_{1-x}\text{S@NC}$  electrode at varied scanning rates of from 0.2 to 1.2  $\text{mV s}^{-1}$ . (b) The fitted logarithmic relations between scanning rates and peak currents. (c) The pseudo-capacitive contribution (orange area) at 1.2  $\text{mV s}^{-1}$ . (d) The pseudo-capacitive contribution at different scanning rates.

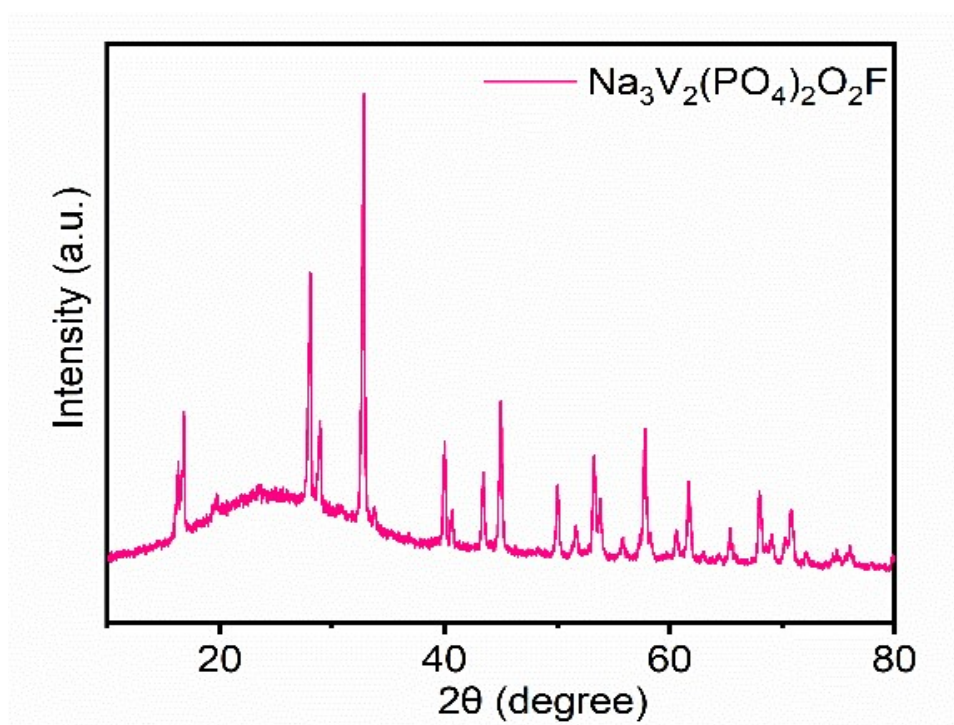

**Fig. S18.** XRD pattern of the  $\text{Na}_3\text{V}_2(\text{PO}_4)_2\text{O}_2\text{F}$ .

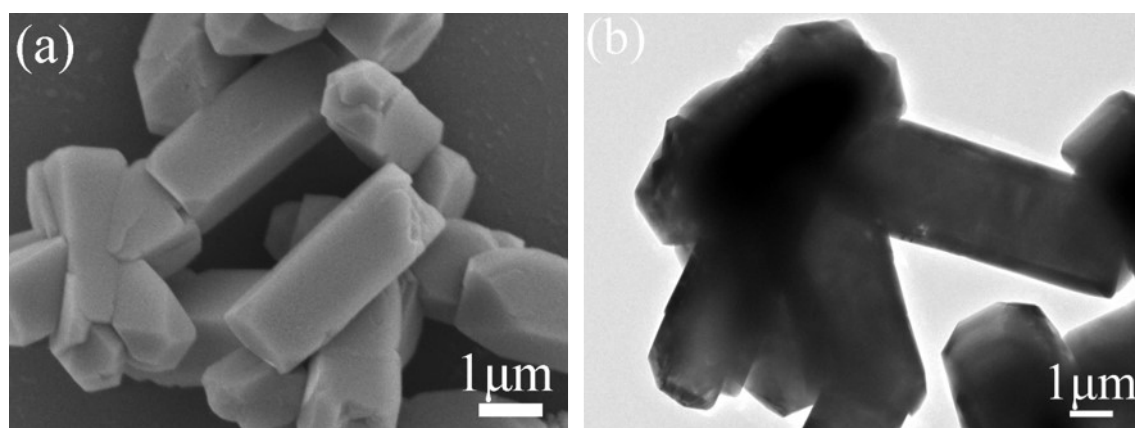

**Fig. S19.** (a) SEM and (b) TEM images of the  $\text{Na}_3\text{V}_2(\text{PO}_4)_2\text{O}_2\text{F}$ .

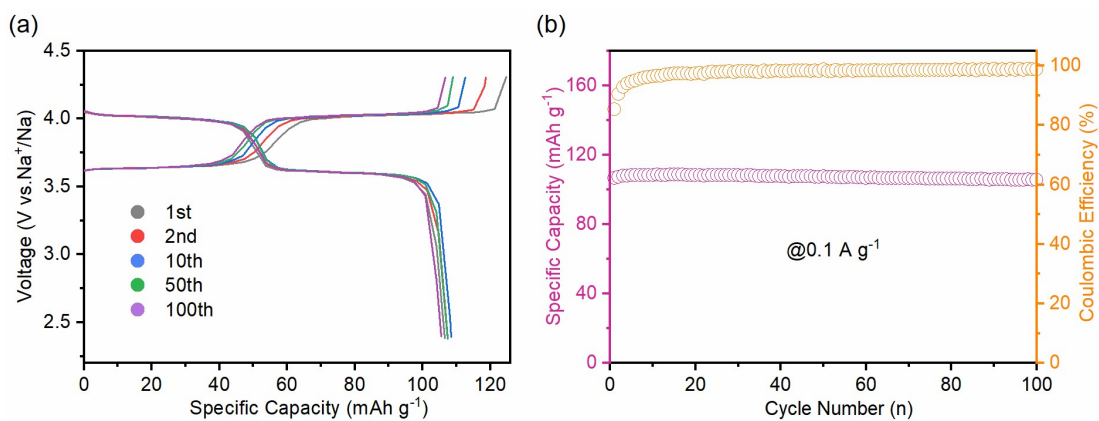

**Fig. S20.** (a) The galvanostatic discharge-charge curves and (b) cycling performance of the  $\text{Na}_3\text{V}_2(\text{PO}_4)_2\text{O}_2\text{F}$  electrode at  $0.1 \text{ A g}^{-1}$ .

**Table S2** Performance comparison of representative SIB full cells

| Anode/cathode                                                                                             | Energy density (Wh/kg) | Reference |
|-----------------------------------------------------------------------------------------------------------|------------------------|-----------|
| $\text{Co}_9\text{S}_8\text{-Co}_{1-x}\text{S@NC}/\text{Na}_3\text{V}_2(\text{PO}_4)_2\text{O}_2\text{F}$ | ~211                   | This work |
| $\text{NiS@rGO}/\text{NVP@C}$                                                                             | ~154                   | 9         |
| $\text{SnS}_2/\text{Co}_3\text{S}_4@\text{CC}/\text{Na}_3\text{V}_2(\text{PO}_4)_2\text{O}_2\text{F}$     | ~216                   | 10        |
| $1\text{T}/2\text{H MoS}_2@\text{SnO}_2/\text{NVP}$                                                       | ~117                   | 11        |
| $\text{Sb}/\text{Na}_3\text{V}_2(\text{PO}_4)_3$                                                          | ~160                   | 12        |
| $\text{Sb}/\text{Na}_3\text{V}_2(\text{PO}_4)_2\text{O}_2\text{F}$                                        | ~230                   | 13        |
| $\text{Na}_{0.44}\text{MnO}_2\text{-hard carbon}$                                                         | ~275                   | 14        |

## Reference

1. Y. Zhang, N. Wang, P. Xue, Y. Liu, B. Tang, Z. Bai and S. Dou, *Chem. Eng.J.*, 2018, **343**, 512-519.
2. Y. Pan, X. Cheng, Y. Huang, L. Gong and H. Zhang, *ACS Applied Materials & Interfaces*, 2017, **9**, 35820-35828.
3. Y. Zhang, N. Wang, P. Xue, Y. Liu, B. Tang, Z. Bai and S. Dou, *Chemical Engineering Journal*, 2018, **343**, 512-519.
4. M. Yin, X. Feng, D. Zhao, Y. Zhao, H. Li, W. Zhou, H. Liu, X. Bai, H. Wang, C. Feng and Q. Jiao, *ACS Sustainable Chemistry & Engineering*, 2019, **7**, 6122-6130.
5. Y. Liu, W. Jiang, M. Liu, L. Zhang, C. Qiang and Z. Fang, *Langmuir*, 2019, **35**, 16487-16495.
6. X. Wang, Y. Chen, Y. Fang, J. Zhang, S. Gao and X. W. Lou, *Angewandte Chemie International Edition*, 2019, **58**, 2675-2679.
7. S. Peng, X. Han, L. Li, Z. Zhu, F. Cheng, M. Srinivansan, S. Adams and S. Ramakrishna, *Small*, 2016, **12**, 1359-1368.
8. D. Liu, A. Hu, Y. Zhu, S. Zhou, Y. Duan, Q. Tang, W. Deng and X. Chen, *Ceramics International*, 2019, **45**, 3591-3599.
9. Y. Luo, L. Shi, H. He, G. Yang, G. Cong, C. Zhu and J. Xu, *Carbon*, 2021, DOI: <https://doi.org/10.1016/j.carbon.2021.05.053>.
10. L. Cheng, Y. Zhang, P. Chu, S. Wang, Y. Li, X. Ren, P. Zhang and L. Sun, *Journal of Materials Chemistry A*, 2021, **9**, 1630-1642.
11. D. Gui, Z. Wei, J. Chen, L. Yan, J. Li, P. Zhang and C. Zhao, *Journal of Materials Chemistry A*, 2021, **9**, 463-471.
12. F. Wan, J.-Z. Guo, X.-H. Zhang, J.-P. Zhang, H.-Z. Sun, Q. Yan, D.-X. Han, L. Niu and X.-L. Wu, *ACS Appl. Mater. Interfaces*, 2016, **8**, 7790-7799.
13. J.-Z. Guo, P.-F. Wang, X.-L. Wu, X.-H. Zhang, Q. Yan, H. Chen, J.-P. Zhang and Y.-G. Guo, *Adv. Mater.*, 2017, **29**, 1701968.
14. X. Li, P. Yan, M. H. Engelhard, A. J. Crawford, V. V. Viswanathan, C. Wang, J. Liu and V. L. Sprenkle, *Nano Energy*, 2016, **27**, 664-672.
